# Supplementary material for: Facile preparation of ellipsoid-like MCM-41 with parallel channels along the short axis for drug delivery and assembly of Ag nanoparticles for catalysis
Source: Royal Society of Chemistry journal article supplement (doi:10.1039/c4ta01820f), 2014-06-11
Supplement: c4ta01820f1.pdf [file c4ta01820f1.pdf]

## Supporting Information

### **Facile preparation of ellipsoidal-like MCM-41 with parallel channels along the short axis for drug delivery and assembly of Ag nanoparticles for catalysis**

Nanjing Hao,<sup>ab</sup> Laifeng Li<sup>\*a</sup> and Fangqiong Tang<sup>\*a</sup>

<sup>a</sup> Technical Institute of Physics and Chemistry, Chinese Academy of Sciences, Beijing, 100190, P. R. China. Email: [tangfq@mail.ipc.ac.cn](mailto:tangfq@mail.ipc.ac.cn); [lilf@mail.ipc.ac.cn](mailto:lilf@mail.ipc.ac.cn)

<sup>b</sup> Graduate School of the Chinese Academy of Sciences, Beijing, 100149, P. R. China.

#### **Materials and Methods**

##### **1. Materials**

Cetyltrimethylammonium bromide (CTAB), sodium dodecylbenzenesulfonate (SDBS), tetraethyl orthosilicate (TEOS), aqueous ammonia, AgNO<sub>3</sub>, NaBH<sub>4</sub>, and 4-nitrophenol (4-NP) were obtained from Beijing Chemical Reagents Company (China). Doxorubicin was purchased from Huafeng United Technology Co. (Beijing). All chemicals were used as received without any further purification.

##### **2. Synthesis of mesoporous silica nanoparticles**

*Ellipsoidal-like MCM-41 with parallel channels along the short axis:* Ellipsoidal-like MCM-41-type mesoporous silica nanoparticles were synthesized with tetraethoxysilane (TEOS) as silica precursor, and a surfactant mixture of cetyltrimethylammonium bromide (CTAB) and sodium dodecylbenzenesulfonate (SDBS) as template in diluted ammonia aqueous solution. In brief, 0.8 g CTAB and 0.2 g SDBS were dissolved in 400 ml H<sub>2</sub>O, and 5 ml NH<sub>3</sub>·H<sub>2</sub>O (25%~28%) was added with stirring for 30 min at room temperature. 5 ml TEOS was then added with stirring for another 5 h. After collected by centrifugation and followed by washed three times with deionic water, the resulting solid products were dried at 80 °C overnight. Surfactant templates were then removed with a heating rate of 1 °C/min in static air up to 600 °C.

*Rod-like MCM-41 with parallel channels along the long axis:* Rod-like MCM-41-type mesoporous silica nanoparticles were synthesized under the similar conditions to the

## Supporting Information

preparation procedure of ellipsoidal-like MCM-41 without the addition of SDBS. Briefly, 0.8 g CTAB was dissolved in 400 ml H<sub>2</sub>O, and 5 ml NH<sub>3</sub>·H<sub>2</sub>O (25%~28%) was added with stirring for 30 min at room temperature. 5 ml TEOS was then added with stirring for another 5 h. After collected by centrifugation and followed by washed three times with deionic water, the resulting solid products were dried at 80 °C overnight. Surfactant templates were then removed with a heating rate of 1 °C/min in static air up to 600 °C.

### 3. Drug Loading and Release

To load Doxorubicin (Dox) into the ellipsoidal-like MCM-41 nanoparticles, the nanoparticles were dispersed in Dox solution (20mg mL<sup>-1</sup>, keeping the weight ratio of nanoparticles to drug at 1:1) and stirred for 24 h at 37 °C, followed by centrifugation and washing once with saline to obtain the drug-loaded ellipsoidal-like MCM-41 nanoparticles. The concentration of Dox was determined by UV/vis spectroscopy measurements at a wavelength of 233 nm. For drug release assay, the Dox-loaded ellipsoidal-like MCM-41 nanoparticles samples were immersed in PBS (pH=4.5), and the supernatant was collected at given time intervals for determining the concentration of Dox. Drug loading and release tests of rod-like MCM-41 with parallel channels along the long axis were same to that of ellipsoidal-like MCM-41. The amount of Dox loaded into rod-like MCM-41 was calculated to be 486 mg per gram nanoparticles.

### 4. Assembly of Ag nanoparticles on ellipsoidal-like MCM-41

To assemble Ag nanoparticles on ellipsoidal-like MCM-41, 300 mg silica host was soaked into 10 ml AgNO<sub>3</sub> (1 wt%) solution for 24 h. After filtered and rinsed thoroughly with deionized water, the product was dried at 60 °C, and then the solid products were treated at 500 °C directly in static air for 1 h to make AgNO<sub>3</sub> decompose into Ag. Assembly test of rod-like MCM-41 were same to that of ellipsoidal-like MCM-41. The content of Ag nanoparticles in rod-like MCM-41 supported Ag nanocomposite was estimated to be 3.62 wt% according to the EDX spectrum result.

### 5. Application of the ellipsoidal-like MCM-41 supported Ag nanocomposite for catalytic reduction of 4-nitrophenol

The reduction of the 4-nitrophenol (4-NP) compound by the ellipsoidal-like MCM-41 supported Ag nanocomposite in the presence of NaBH<sub>4</sub> was carried out to examine the catalytic activity and reusability of the ellipsoidal-like MCM-41 supported Ag nanocomposite. Typically, an aqueous solution of NaBH<sub>4</sub> ( $2 \times 10^{-3}$  mol L<sup>-1</sup>) was mixed with aqueous 4-NP solution ( $2.7 \times 10^{-4}$  mol L<sup>-1</sup>) in the quartz cell. Then, ellipsoidal-like MCM-41 supported Ag nanocomposite catalysts ( $0.1 \times 10^{-4}$  mol L<sup>-1</sup> relative to Ag nanoparticles) were added to the mixture and quickly placed in the cell holder of the spectrophotometer. The progress of the

## Supporting Information

conversion of 4-NP to 4-aminophenol (4-AP) was then monitored via UV/vis spectroscopy by recording the time-dependent absorbance spectra of the reaction mixture in a scanning range of 200–600 nm at ambient temperature. Catalytic test of rod-like MCM-41 were same to that of ellipsoidal-like MCM-41.

### 6. Characterization

Transmission electron microscopy (TEM) and high-resolution transmission electron microscopy (HRTEM) were performed on a JEOL JEM 2010F electron microscope operating at 200 kV. The energy-dispersive X-ray (EDX) spectroscopic measurements were performed with the spectrometer attached on the JEOL-2010F HRTEM. A JASCO V-570 spectrophotometer was used to measure the UV/vis spectra of the nanoparticles at room temperature. Fourier transform infrared spectrometry (FT-IR) was performed on an Excalibur 3100 Fourier transform infrared spectrometer. X-ray diffraction (XRD) patterns were obtained using Cu K $\alpha$  radiation ( $\lambda_{K\alpha 1} = 1.5406\text{\AA}$ ) and a wide-angle graphite monochromator. Nitrogen adsorption–desorption measurements were carried out to determine the textural properties of silica materials by using a Quantachrome NOVA 4200e surface area analyzer at  $-196\text{ }^{\circ}\text{C}$ . The prepared products were dried at  $300\text{ }^{\circ}\text{C}$  before analysis. Pore-size distributions were estimated from adsorption branches of the isotherms by using the Barrett–Joyner–Halenda (BJH) method. Pore volumes were determined from the amounts of N<sub>2</sub> adsorbed at the single point of  $P/P_0 = 0.98$ .

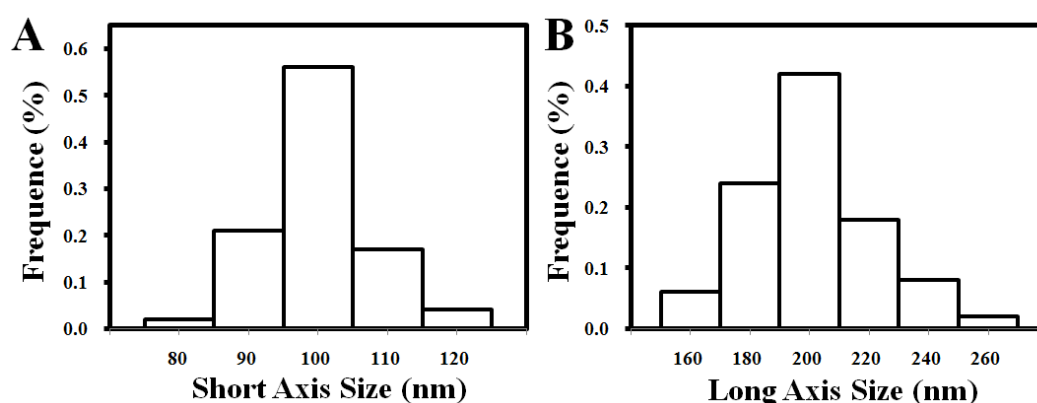

**Figure S1.** Statistical short axis (A) and long axis (B) size distribution of ellipsoidal-like MCM-41 nanoparticles from 200 particles in the TEM images.

## Supporting Information

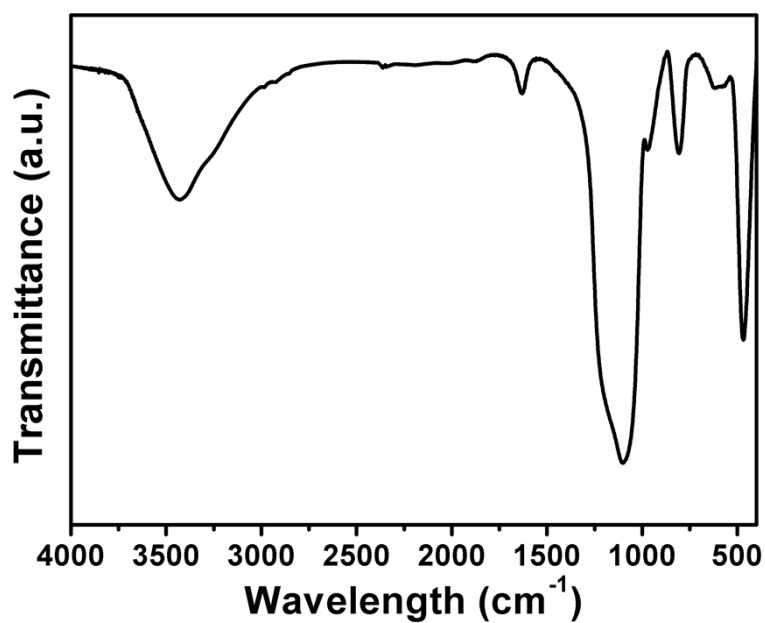

**Figure S2.** FT-IR spectra for the ellipsoidal-like MCM-41 nanoparticles after calcination treatment.

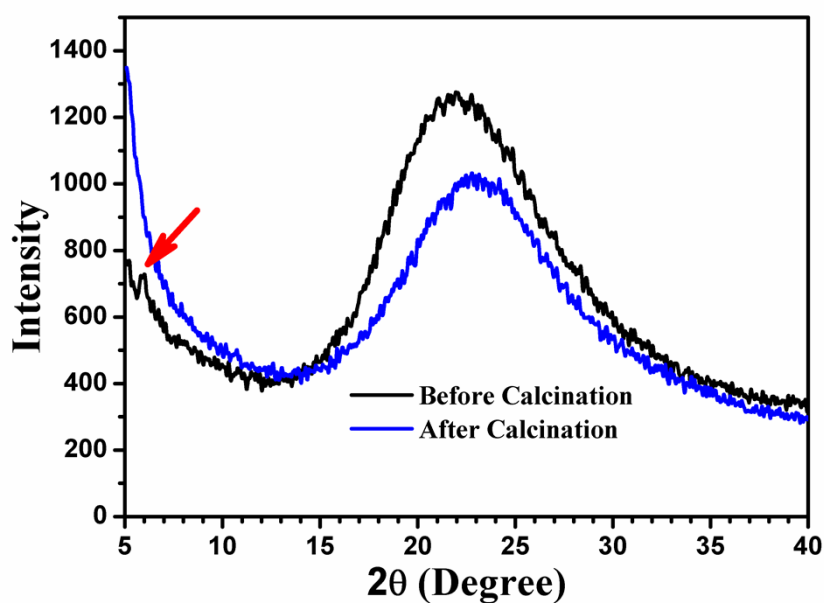

**Figure S3.** X-ray diffraction patterns of the ellipsoidal-like MCM-41 nanoparticles before and after calcination treatment.

## Supporting Information

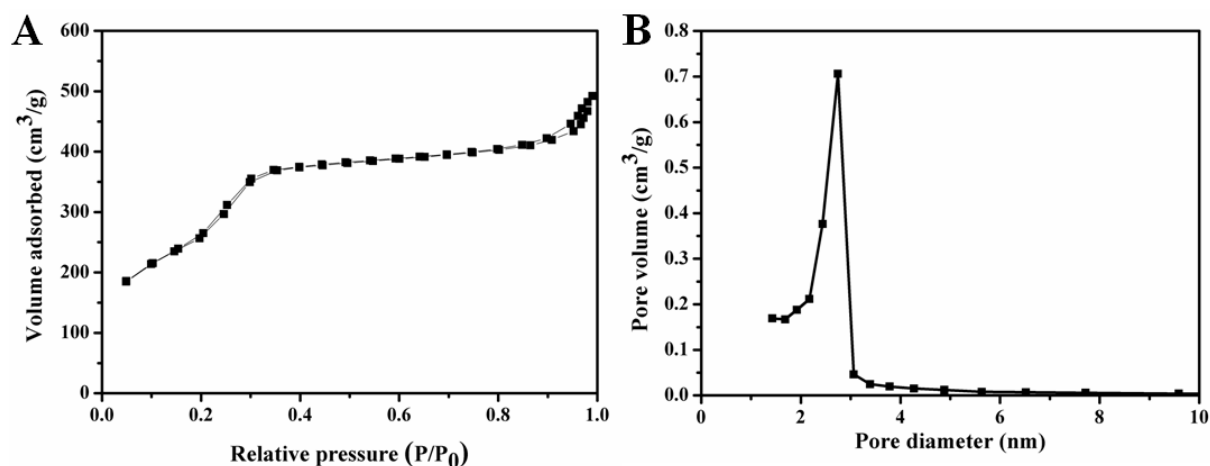

**Figure S4.** (A) N<sub>2</sub> adsorption-desorption isotherm of calcined ellipsoidal-like MCM-41; (B) The corresponding adsorption pore size distribution plot by BJH method.

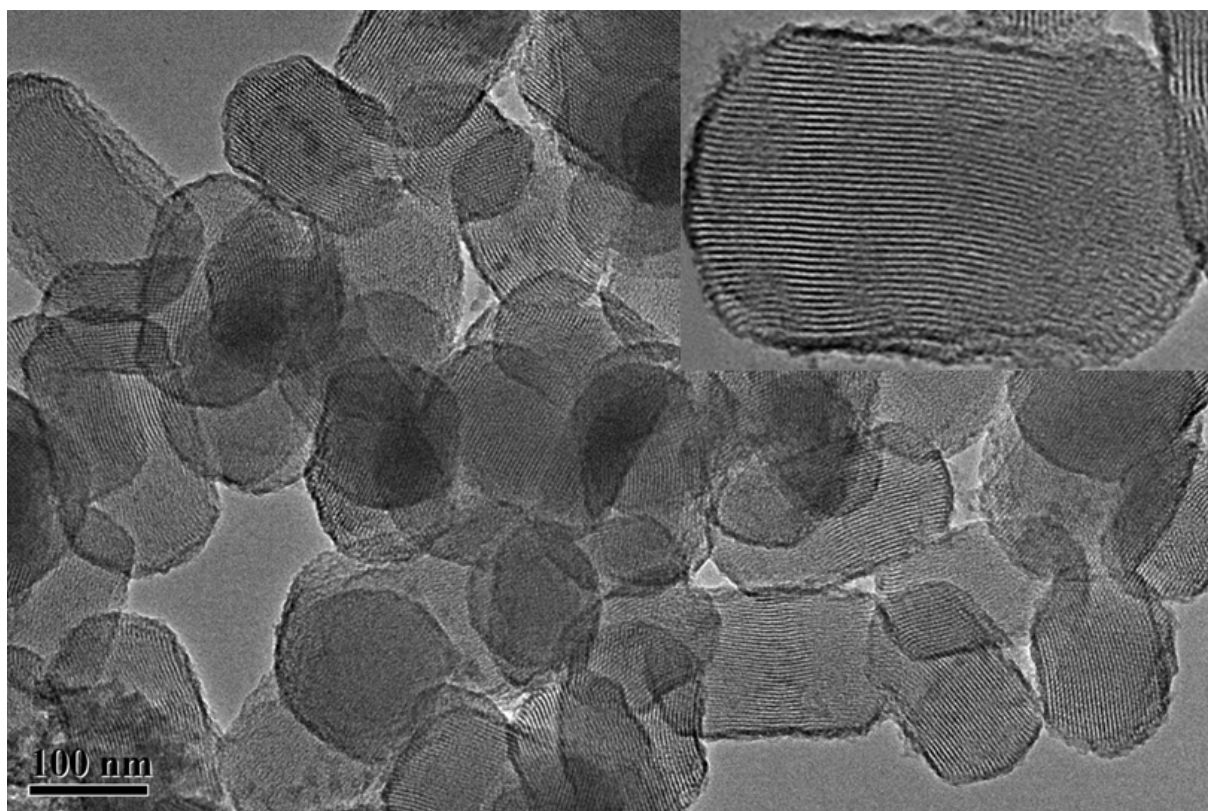

**Figure S5.** TEM image of rod-like MCM-41 with parallel channels along the long axis. The inset of TEM image with higher magnification shows ordered mesoporous structure with straight channels.

## Supporting Information

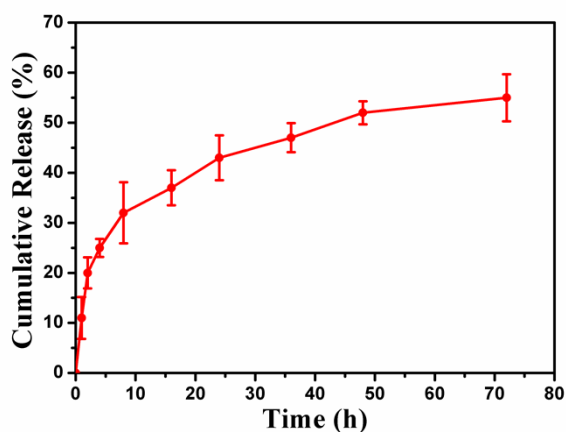

**Figure S6.** Released profile of Doxorubicin from drug-loaded rod-like MCM-41 with channels oriented along the long axis in PBS solution (pH=4.5). Points shown indicate mean of three replicates. Data represent the mean  $\pm$  SD.

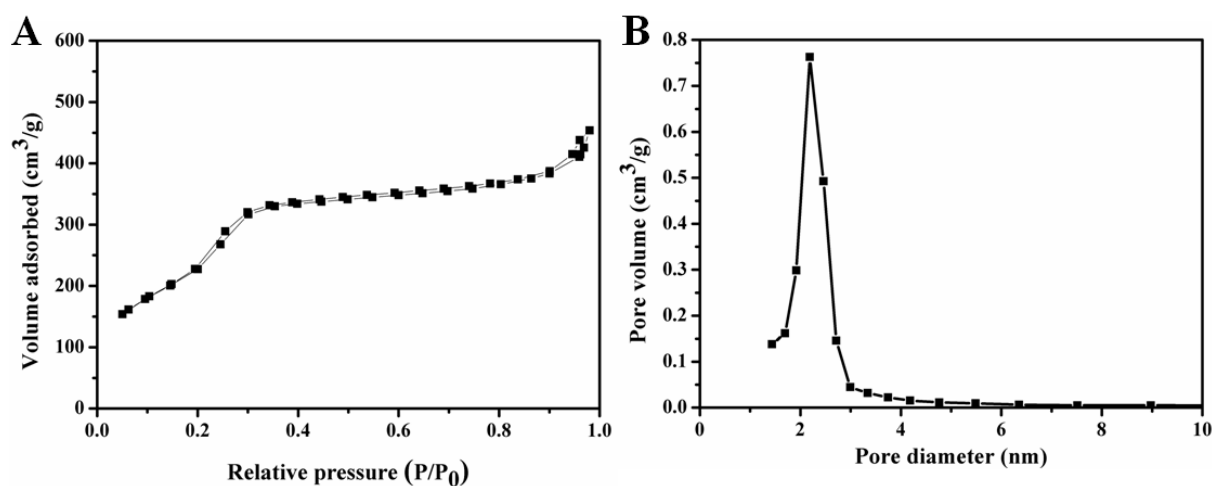

**Figure S7.** (A) N<sub>2</sub> adsorption-desorption isotherm of ellipsoidal-like MCM-41 supported Ag nanocomposite; (B) The corresponding adsorption pore size distribution plot by BJH method.

## Supporting Information

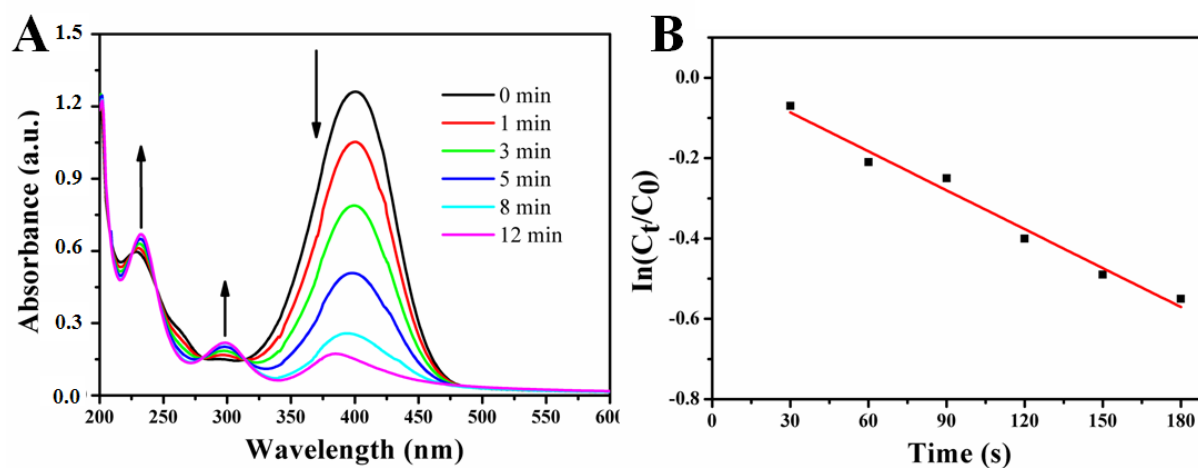

**Figure S8.** (A) UV/Vis absorption spectrum of 4-nitrophenol catalyzed by the rod-like MCM-41 supported Ag nanocomposite; (B) Linear relationship between  $\ln(C_t/C_0)$  and time for 4-nitrophenol (400 nm), the ratios of 4-NP concentration ( $C_t$  at time  $t$ ) to its initial value  $C_0$  ( $t = 0$ ) were directly given by the relative intensity of the respective absorbance  $A_t/A_0$ .
